# Supplementary material for: Leptin Levels of the Perinatal Period Shape Offspring’s Weight Trajectories through the First Year of Age
Source: MDPI journal article supplement (doi:10.3390/nu14071451), 2022-03-30
Supplement: s1 [file s1]

**Table S1.** Weight percentile at 12 month of age in the three different groups of children.

| groups | < 10° C | 10°-50 ° C | 50°- 90° C |
|--------|---------|------------|------------|
| FT     | 2       | 13         | 1          |
| PT     | 3       | 7          | 6          |
| IUGR   | 7       | 4          | 2          |

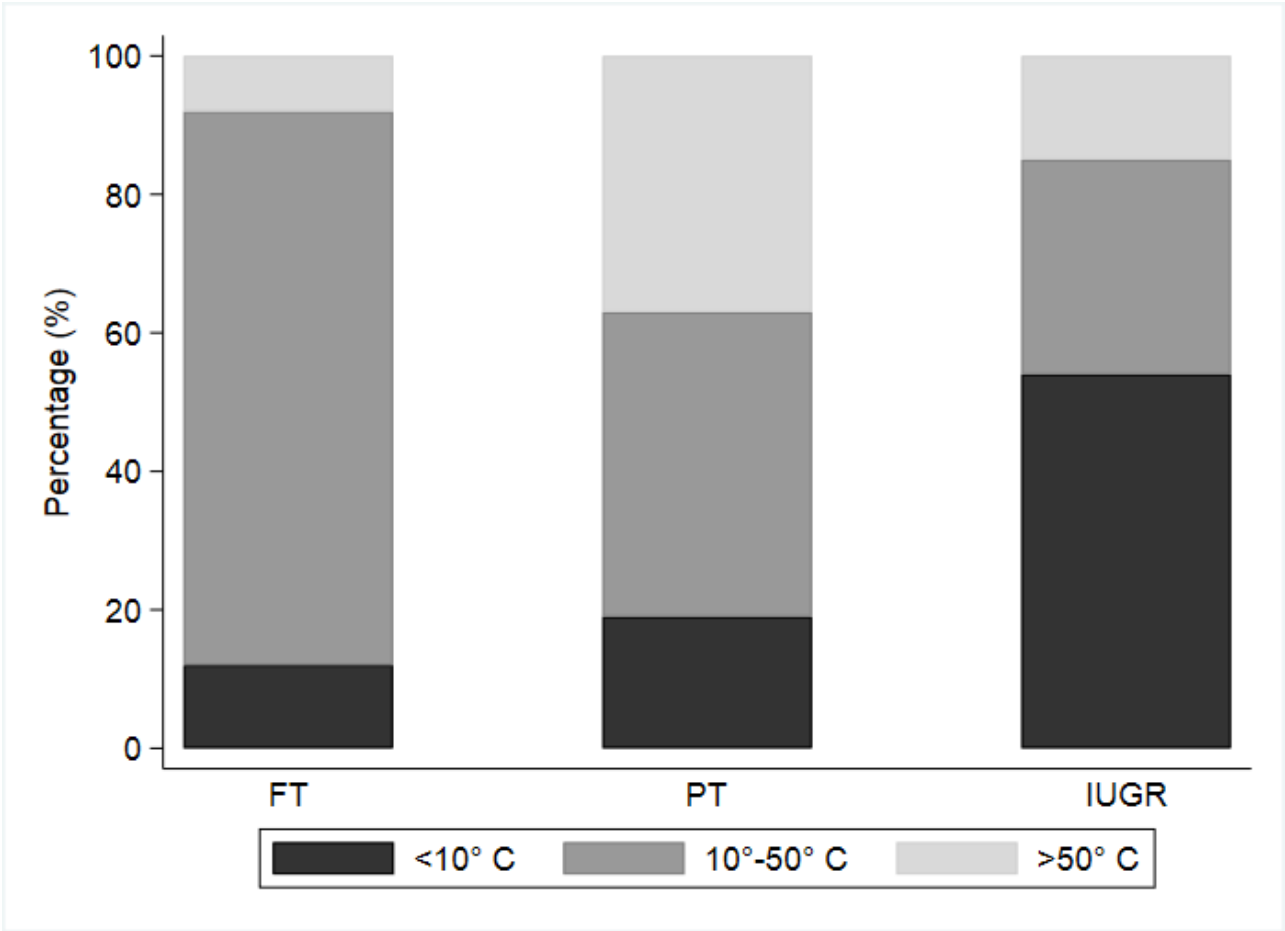

**Figure S1.** Distribution of weight percentiles across types of neonate through 12 months of age (Fisher's test  $p=0.016$ ).
